# Supplementary material for: Simultaneous Photocatalytic Sugar Conversion and Hydrogen Production Using Pd Nanoparticles Decorated on Iron-Doped Hydroxyapatite
Source: MDPI journal article supplement (doi:10.3390/catal13040675), 2023-03-30
Supplement: s1 [file s1]

## Supplementary Material

# Simultaneous Photocatalytic Sugar Conversion and Hydrogen Production Using Pd Nanoparticles Decorated on Iron-Doped Hydroxyapatite

Chitiphon Chuaicham <sup>1,\*</sup>, Yuto Noguchi <sup>1</sup>, Sulakshana Shenoy <sup>1</sup>, Kaiqian Shu <sup>1</sup>, Jirawat Trakulmututa <sup>1</sup>, Assadawoot Srikhaow <sup>1</sup>, Karthikeyan Sekar <sup>1,2</sup> and Keiko Sasaki <sup>1,\*</sup>

<sup>1</sup> Department of Earth Resources Engineering, Kyushu University, Fukuoka 819-0395, Japan

<sup>2</sup> Department of Chemistry, Faculty of Engineering and Technology, SRM Institute of Science and Technology, Kattankulathur 603203, Tamil Nadu, India

\* Correspondence: song@mine.kyushu-u.ac.jp (C.C.); keikos@mine.kyushu-u.ac.jp (K.S.)

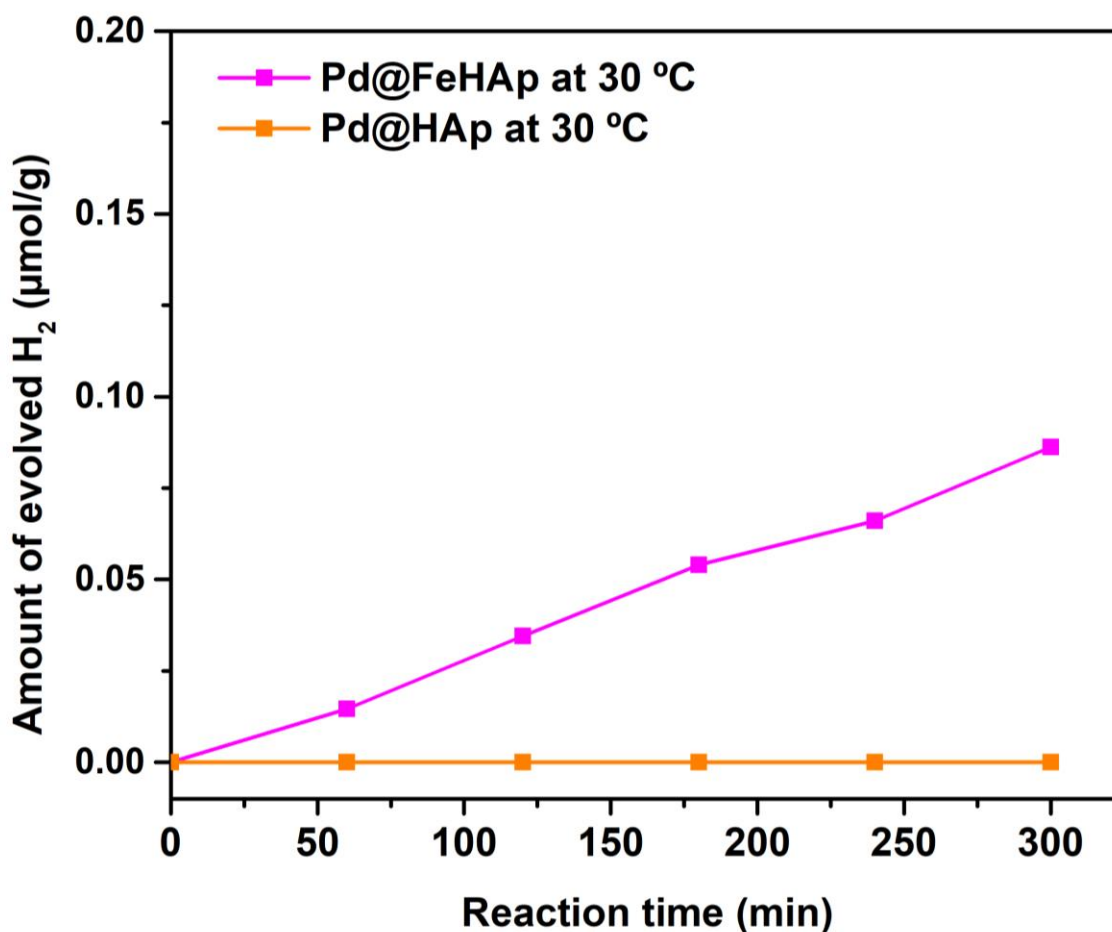

**Figure S1.** Time course of photocatalytic H<sub>2</sub> production over Pd@HAp and Pd@FeHAp.

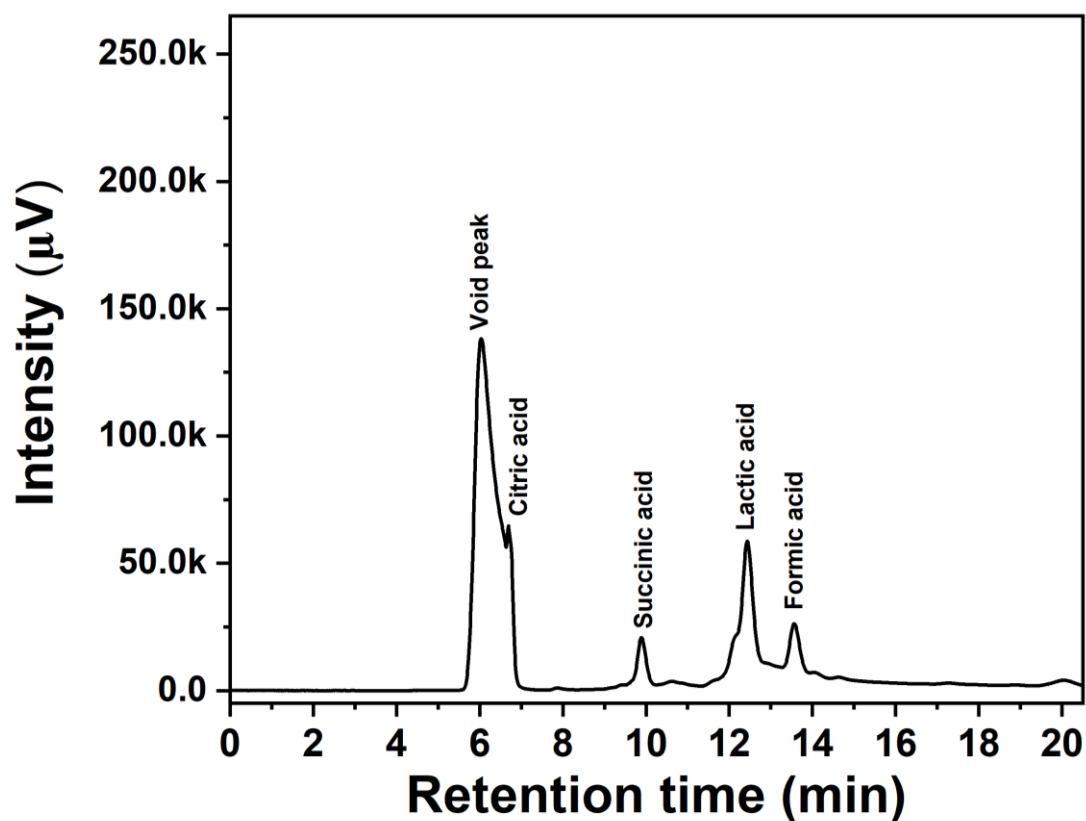

**Figure S2.** HPLC spectrum of the solution after the simultaneous photocatalytic sugar conversion and hydrogen production over Pd@HAp for 4h at 30°C.
