# Supplementary material for: Simultaneous Photocatalytic Sugar Conversion and Hydrogen Production Using Pd Nanoparticles Decorated on Iron-Doped Hydroxyapatite
Source: MDPI journal article supplement (doi:10.3390/catal13040675), 2023-03-30
Supplement: s1 [file s1]

Archive with 1 entries (1 files):
- catalysts-2237841-supplementary.pdf
